# Supplementary material
Source: publisher figshare collection journal article supplement (https://sage.figshare.com/ndownloader/files/14375450)
Supplement: Supplementary file 1 [file 14375450]

## Supplementary Material

A validation study of administrative healthcare data to detect acute kidney injury in the pediatric intensive care unit

David D'Arienzo MD<sup>1\*</sup>, Erin Hessey MSc<sup>2\*</sup>, Rami Ali MD<sup>3,4</sup>, Sylvie Perreault BPharm, PhD<sup>5</sup>, Susan Samuel MD, MSc<sup>6</sup>, Louise Roy MD<sup>7</sup>, Jacques Lacroix MD<sup>8</sup>, Philippe Jouvett MD, PhD<sup>8</sup>, Genevieve Morissette MD<sup>8</sup>, Marc Dorais MSc<sup>9</sup>, Jean-Philippe Lafrance MD, MSc<sup>7</sup>, Veronique Phan MD, MSc<sup>10</sup>, Michael Pizzi BSc<sup>11</sup>, Rahul Chanchlani MD, MSc<sup>12</sup>, Michael Zappitelli MD, MSc<sup>13</sup>

\*The first two authors contributed equally to this submission (co-first authors)

<sup>1</sup> Faculty of Medicine, McGill University, Montreal, Quebec, Canada

<sup>2</sup> Faculty of Medicine, University of Alberta, Edmonton, Alberta, Canada

<sup>3</sup> Department of Family Medicine, GMF Centre Medical Hochelaga, Montreal, Canada

<sup>4</sup> Department of Family-Emergency Medicine, Hôpital Général de Hawkesbury and District General Hospital Inc, Hawkesbury, Canada

<sup>5</sup> Faculty of Pharmacy, Université de Montréal, Montréal, Quebec, Canada

<sup>6</sup> Department of Pediatrics, Division of Nephrology, Faculty of Medicine, University of Calgary, Calgary, Canada

<sup>7</sup> Department of Medicine, Division of Nephrology, Université de Montréal, Montreal, Quebec, Canada

<sup>8</sup> Department of Pediatrics, Division of Intensive Care, Centre Hospitalier Universitaire Sainte-Justine, Université de Montréal, Montreal, Canada

<sup>9</sup> StatScience Inc, Notre-Dame-de-l'Île-Perrot, Canada

<sup>10</sup> Department of Pediatrics, Division of Nephrology, Centre Hospitalier Ste-Justine, Université de Montréal, Canada

<sup>11</sup> McGill University, Montreal, Quebec, Canada

<sup>12</sup> Department of Pediatrics, Division of Nephrology, McMaster University, Hamilton, Ontario, Canada

<sup>13</sup> Department of Pediatrics, Division of Nephrology, Toronto Hospital for Sick Children, University of Toronto, Toronto, Ontario, Canada

Corresponding author contact: M. Zappitelli, Toronto Hospital for Sick Children, Peter Gilgan Centre for Research and Learning, 686 Bay Street, Child Health Evaluative Services, Room 6<sup>th</sup> floor 6.9708, Toronto, Ontario, M5G 0A4

Tel: 416-813-7654, extension 304077; email: [Michael.zappitelli@sickkids.ca](mailto:Michael.zappitelli@sickkids.ca)

Running Title : Evaluation of Diagnostic codes for pediatric AKI

Supplementary Table 1. Chart-AKI definition, by the reference standard chart review

| <b>AKI Stage</b> | <b>Serum Creatinine</b>                                                                                                                                  | <b>Urine output</b>                                  |
|------------------|----------------------------------------------------------------------------------------------------------------------------------------------------------|------------------------------------------------------|
| <b>Stage 1</b>   | ≥1.5-1.9 times baseline in 7 days or<br>0.3 mg/dl (≥26.5 μmol/l) rise within 48 hours                                                                    | < 0.5 ml/kg/h for 8 hours                            |
| <b>Stage 2</b>   | ≥2.0-2.9 times baseline                                                                                                                                  | < 0.5 ml/kg/h for 16 hours                           |
| <b>Stage 3</b>   | ≥3.0 times baseline or<br>≥4 mg/dl (353.6 μmol/l) rise or<br>eGFR < 35 ml/min/1.73m <sup>2</sup> [if > 3 months old]<br>or<br>Dialysis treatment for AKI | < 0.3 ml/kg/h for 24 hours or<br>Anuric for 12 hours |

Abbreviations: *AKI*: acute kidney injury; *GFR*: glomerular filtration rate.

Supplementary Table 2. AKI defined using administrative health care data diagnostic and procedure codes (only ICD-9 codes used in this study).

| <b>Description</b>                                       | <b>ICD-9<br/>(used in this study)</b>                                                                                                                     | <b>ICD-10<sup>‡</sup></b>         | <b>Notes</b>                                         |
|----------------------------------------------------------|-----------------------------------------------------------------------------------------------------------------------------------------------------------|-----------------------------------|------------------------------------------------------|
| <b>AKI codes</b>                                         |                                                                                                                                                           |                                   |                                                      |
| AKI                                                      | 584.5, 584.6, 584.7, 584.8, 584.9                                                                                                                         | N17.0, N17.1, N17.2, N17.8, N17.9 | N/A                                                  |
| AKI unspecified                                          | 586.9                                                                                                                                                     | N19                               | N/A                                                  |
| Abnormal renal function                                  | 794.4                                                                                                                                                     | R94.4                             | N/A                                                  |
| Pregnancy AKI                                            | <u>634.3</u> (SUF 1, 2, 9),<br><u>635.3</u> (SUF 1, 2, 9),<br><u>636.3</u> (SUF 1, 2, 9),<br><u>637.9</u> ((SUF 1, 2, 9)), 638.3, 639.3, 669.3 (SUF 2, 4) | O904.0 (SUF 2, 4, 9)              | No equivalent ICD-10 codes for the underlined codes. |
| GN                                                       | 580.0, <u>580.4</u> , 580.8, 580.9                                                                                                                        | N00.x                             | No equivalent ICD-10 code for the underlined code.   |
| <b>Dialysis codes</b>                                    |                                                                                                                                                           |                                   |                                                      |
| Dialysis codes                                           | V45.1<br>V56.0<br><u>V56.1</u><br><u>V56.2</u><br>V56.8                                                                                                   | Z99.2<br>Z49.1<br><br>Z49.2       | No equivalent ICD-10 codes for the underlined codes. |
| <b>Procedural codes</b>                                  |                                                                                                                                                           |                                   |                                                      |
| <b>Description</b>                                       | <b>CCA<br/>(used in this study)</b>                                                                                                                       | <b>CCI<sup>‡</sup></b>            | <b>Notes</b>                                         |
| Hemodialysis                                             | 5195                                                                                                                                                      | 1PZ21HQBS<br>1PZ21HQBR            | N/A                                                  |
| Peritoneal dialysis                                      | 6698                                                                                                                                                      | 1PZ21HPD4                         |                                                      |
| <b>Administrative health data-defined AKI algorithms</b> |                                                                                                                                                           |                                   |                                                      |
| Admin-AKI                                                | Any AKI code above                                                                                                                                        |                                   |                                                      |
| Admin-AKI +D                                             | Any AKI code plus any dialysis code above                                                                                                                 |                                   |                                                      |
| Admin-AKI (no pregnancy or GN)                           | Any AKI code above, but ignoring Pregnancy and GN codes                                                                                                   |                                   |                                                      |
| Admin-AKI +D (no pregnancy or GN)                        | Any AKI code plus any dialysis code above, but ignoring Pregnancy and GN codes                                                                            |                                   |                                                      |

<sup>‡</sup> ICD-10 and CCI codes were not included in the algorithms undergoing validation for the current study (study period was 2003-2005, when these codes were not being used). The ICD-10 and CCI codes listed are for use in future evaluation and research on AKI in children.

Abbreviations: *AKI*: Acute Kidney Injury; *ICD*: International Classification of Disease; *GN*: Glomerulonephritis; *D*: Dialysis; *CCA*: Certified Coding Associate; *CCI*: Canadian Classification of Health Interventions
